# Supplementary material
Source: PubMed Central journal article supplement (PMC3195479)

## SUPPLEMENTAL FIGURES

**Supplemental Figure 1: Further characterization of the endotoxemia model.** (A) real-time PCR for markers of renal injury on kidney RNA taken 18 h after vehicle control (n = 9) or LPS (n = 13-15) treatment. Results normalized to  $\beta$ -actin and presented on log10 scale \*p < 0.05, \*\*\*p < 0.0001. (B) Hypoxia inducible factor-1 $\alpha$  (HIF-1 $\alpha$ ) protein measured by commercial ELISA (standard curve depicted in upper panel) in whole kidneys homogenates prepared 18 h after vehicle or LPS treatment (n = 5 per condition).

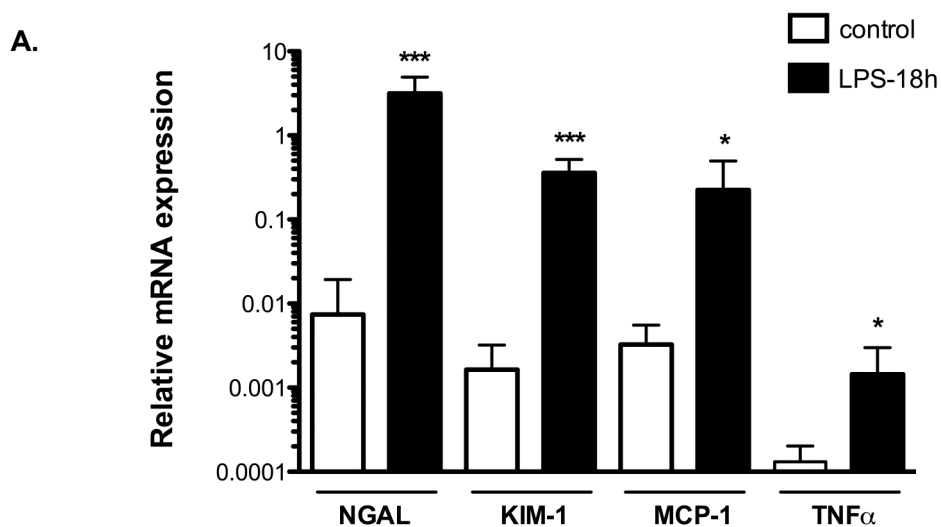

**B.**

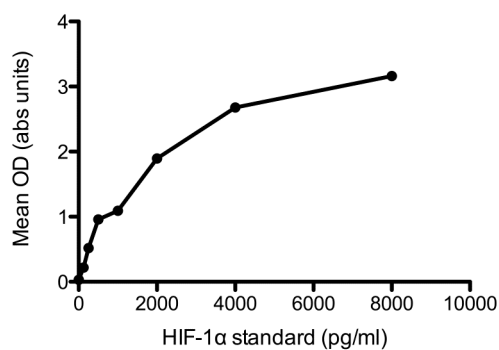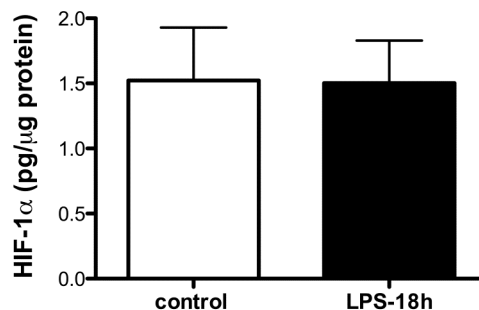

**Supplemental Figure 2: In situ enzyme chemistry. (A)** Cytochrome c oxidase enzyme activity of kidneys 24 h after sham operation or CLP (OSOM for outer stripe of outer medulla, representative of n = 3 per condition). Original magnification: x10 (cortex and outer medulla); x20 (cortex, OSOM). **(B)** NADH dehydrogenase enzyme activity 18 h after vehicle or LPS exposure. Representative of n = 4 per condition. Original magnification: x10 (cortex and outer medulla); x20 (cortex).

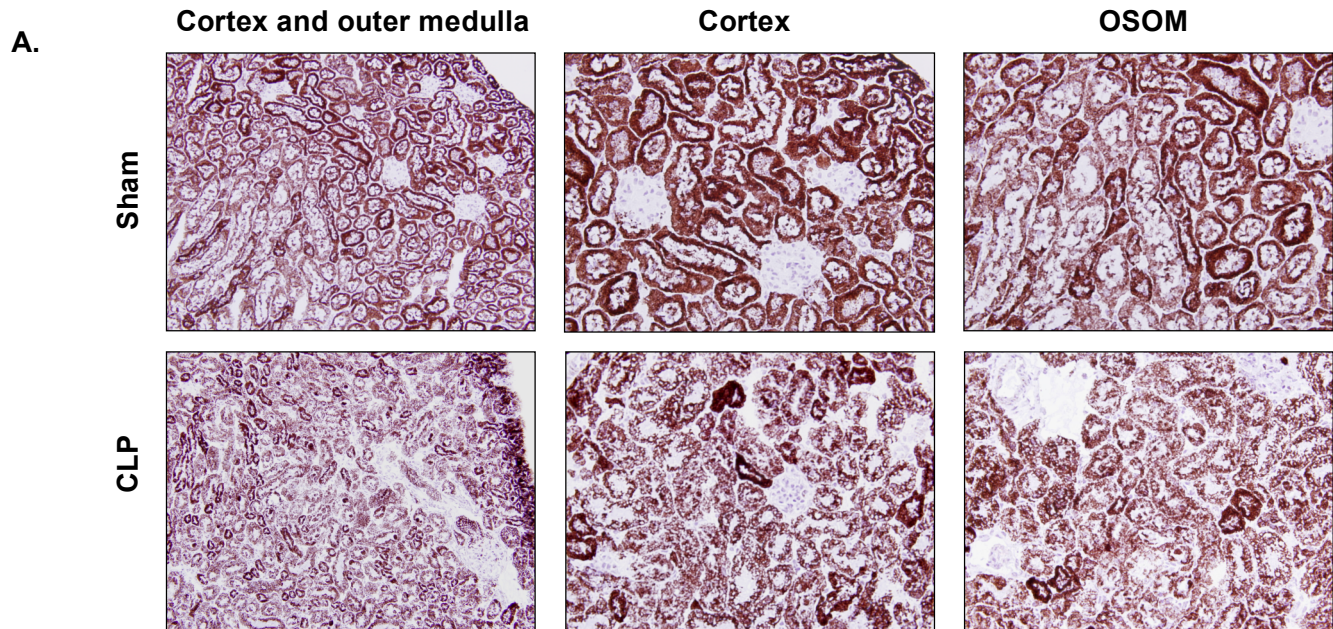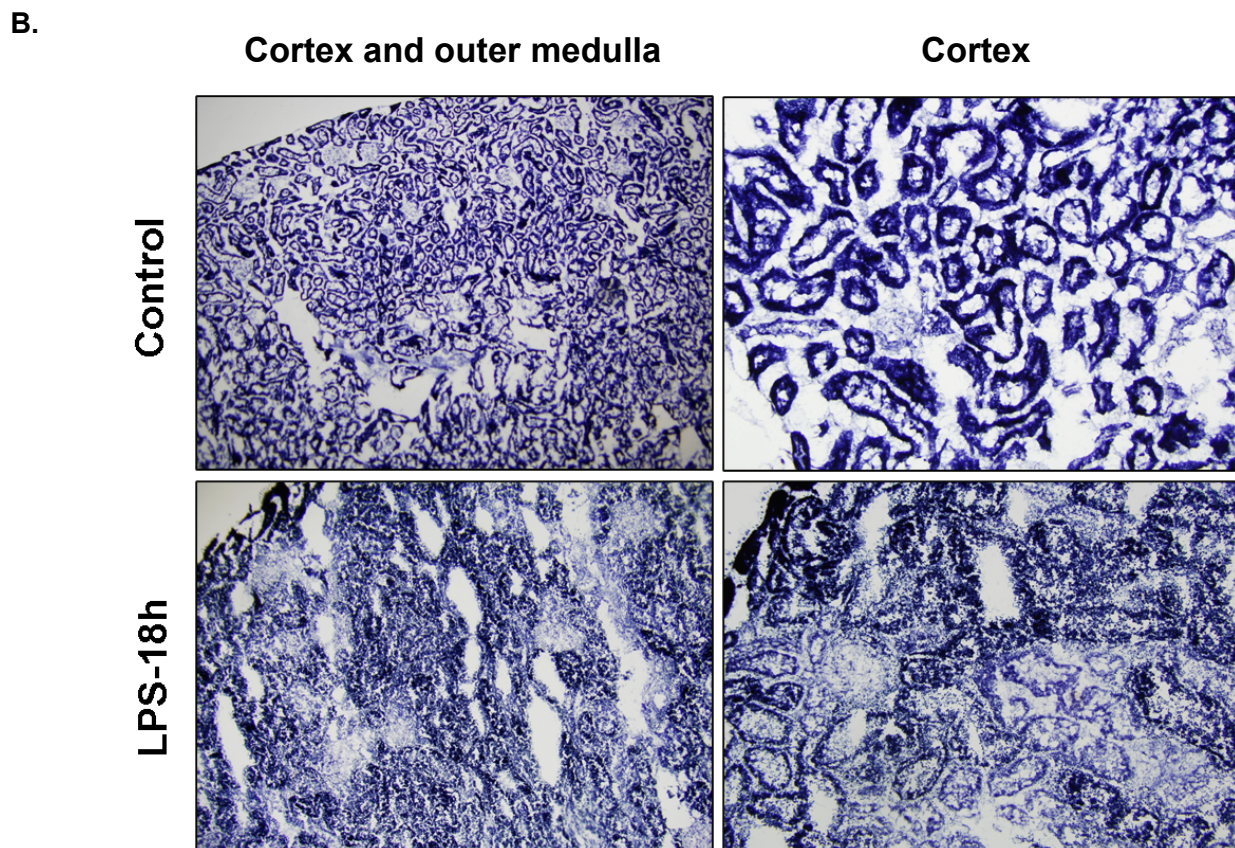

**Supplemental Figure 3: Suppression of PGC-1 $\alpha$  and downstream gene expression in proportion to the degree of renal functional impairment. (A)** Transcript abundance relative to  $\beta$ -actin was measured by real-time PCR for the indicated genes in  $n = 35$ -37 kidney RNAs prepared at 0, 18, or 42 h in the resuscitated LPS model (LPS 10 mg/kg at  $t = 0$  h followed by 10 ml/kg saline at  $t = 18$  h). These data demonstrate that, regardless of heterogeneity within any given time point, gene expression is strongly associated with the degree of functional impairment as measured by BUN. Note that PGC-1 $\beta$  expression does not significantly correlate to the degree of impairment. **(B)** 18 h after cecal ligation and perforation, mice were sacrificed for measurement of renal function and renal PGC-1 $\alpha$  expression ( $n = 7$ ,  $p = 0.0067$ ). Correlation coefficient ( $r$ ) and  $p$ -values for **(A)** and **(B)** calculated by Spearman method.

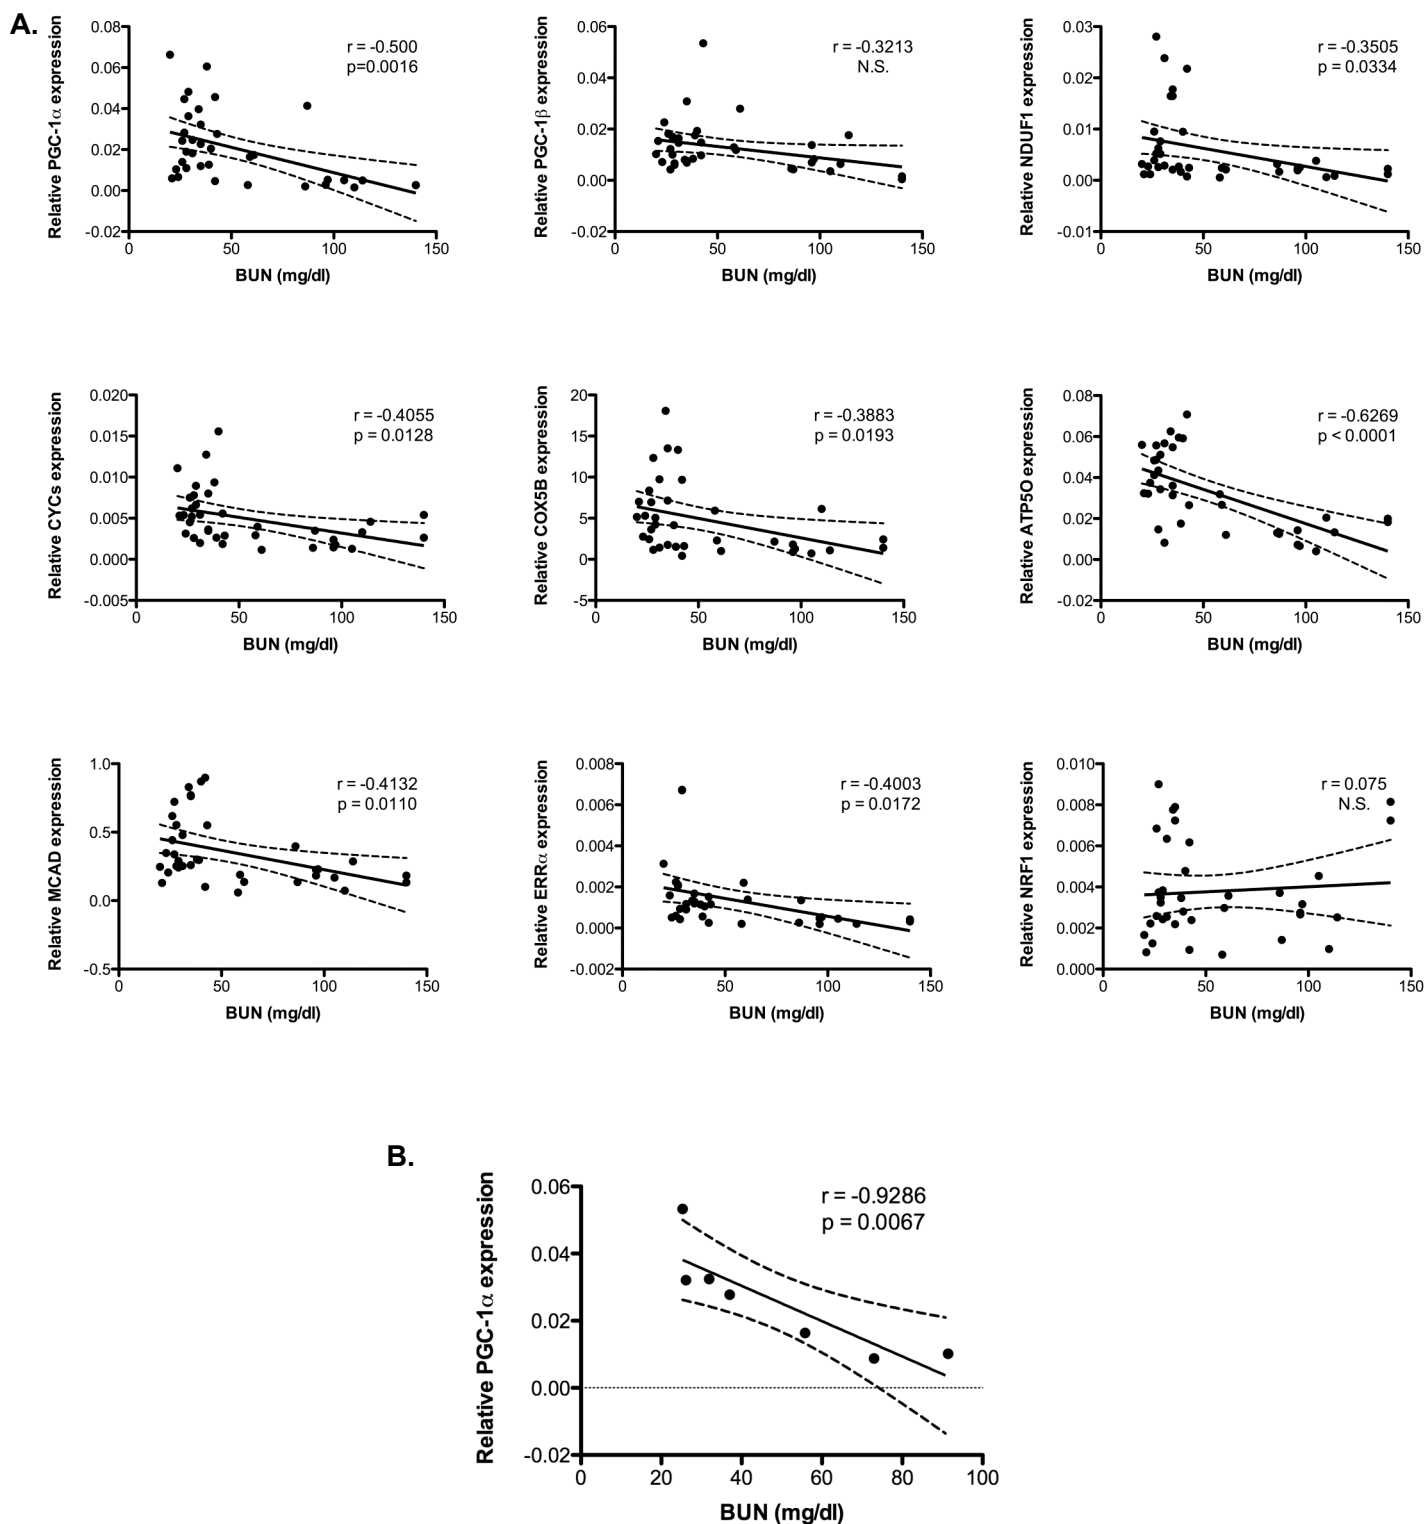

**Supplemental Figure 4: Validation of renal PGC-1 $\alpha$  suppression in endotoxemia by Western analysis.** (A) Confirmation of the specificity of the anti-PGC-1 $\alpha$  antibody. (B) Measurement of PGC-1 $\alpha$  in whole kidney homogenates prepared 18 h after vehicle or LPS.

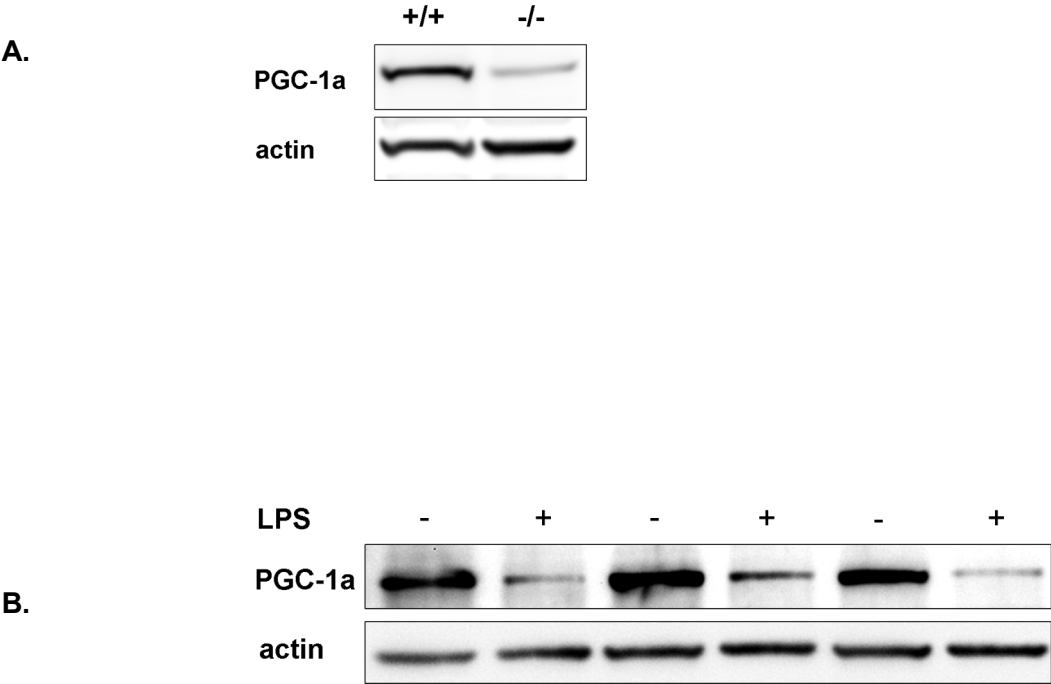

**Supplemental Figure 5: Time-course of renal function and PGC-1 $\alpha$  changes in the resuscitated LPS model. (A, B)** BUN and creatinine changes in following LPS. 10 ml/kg saline was injected intraperitoneally at 18 h after LPS to resuscitate animals ( $n \geq 4$  per time point). **(C)** Expression of PGC-1 $\alpha$  in renal homogenates collected from animals in (A, B) above showing an inverse pattern to BUN or creatinine and revealing the nadir of expression to occur near 18 h after LPS. **(D)** Western analysis of renal lysates from representative animals in (A, B) above.

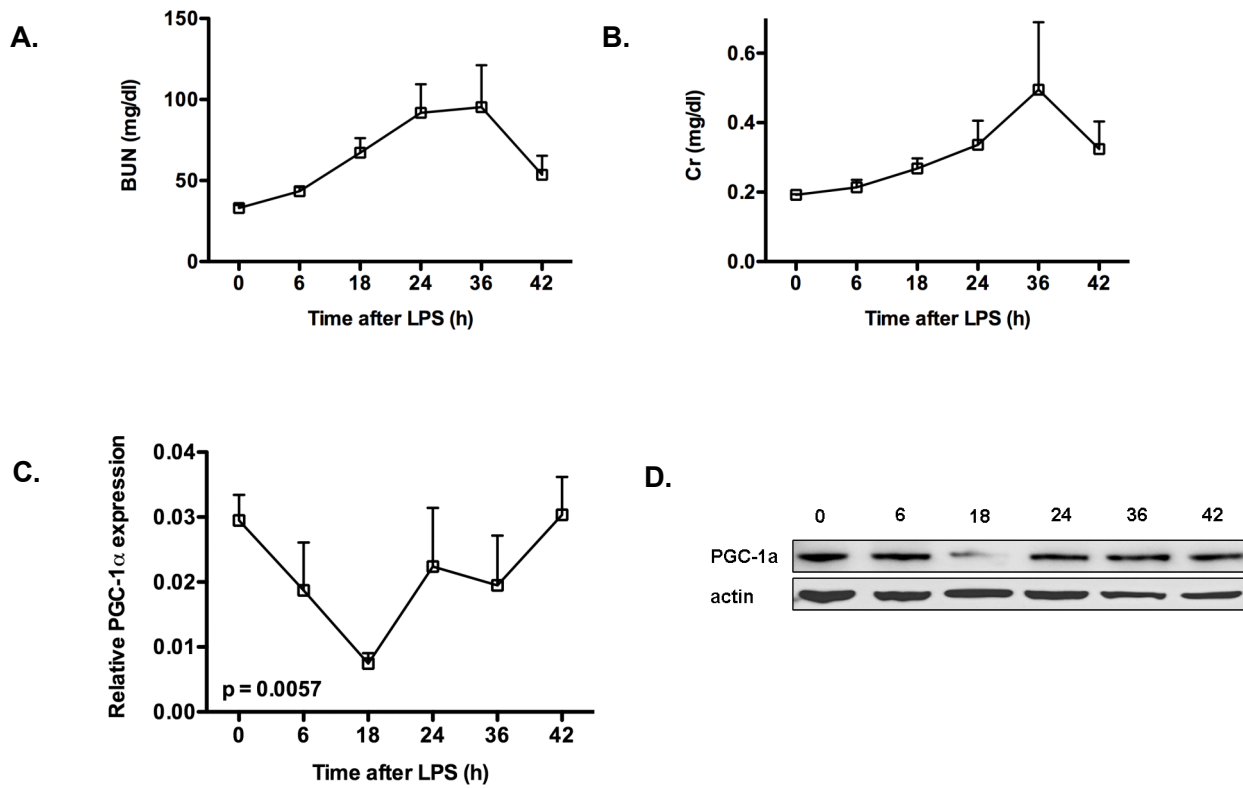

**Supplemental Figure 6: Dose and time-dependent suppression of PGC-1 $\alpha$  by TNF $\alpha$  in a second in vitro human proximal tubule model, the HK-2 cell line. (A) Abundance of PGC-1 $\alpha$  transcript relative to  $\beta$ -actin in HK-2 cells treated with LPS at the indicated doses and durations (n = 3-5 per condition). Note: LPS was supplemented with LPS-binding protein and CD14. (B) Abundance of PGC-1 $\alpha$  transcript relative to  $\beta$ -actin in HK-2 cells treated with TNF $\alpha$  at the indicated doses and durations (n = 3-5 per condition).**

**A.**

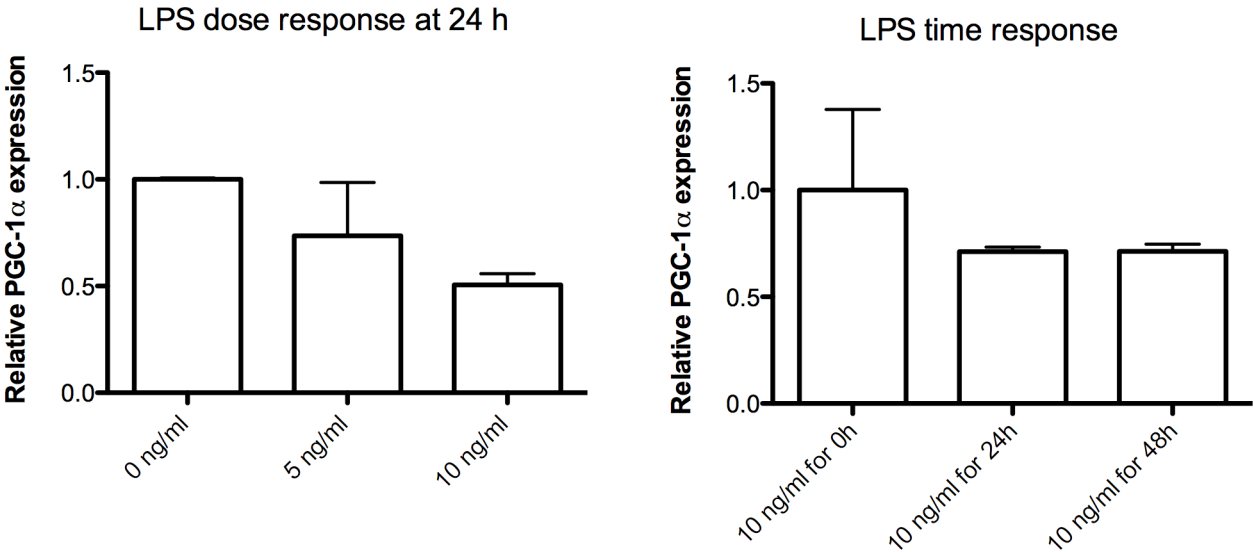

**B.**

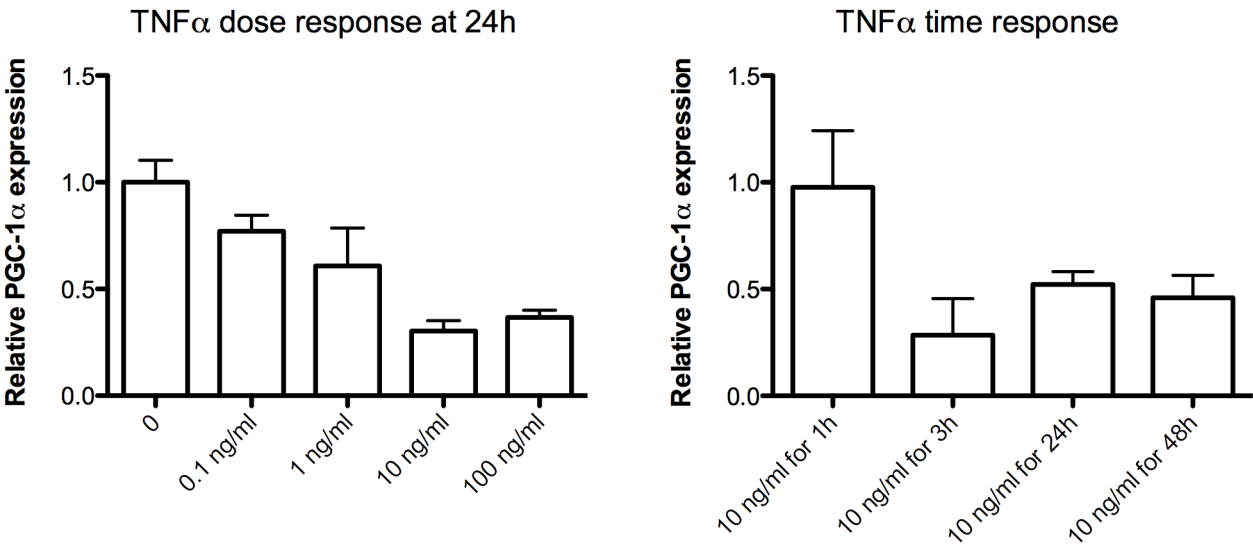

**Supplemental Figure 7: Baseline renal parameters of PGC-1 $\alpha$  global and proximal-tubule specific knockout mice. (A)** (left) BUN and Cr of knockout male mice at 8 weeks of age and wild-type littermates. (right) Giemsa-stained semi-thin section of cortex (upper row; original magnification: x40), transmission EM of basement membranes showing intact foot processes (middle row; original magnification: x3200), and high-power transmission EM of proximal tubule mitochondria (lower row; original magnification: x18,000). Arrow points to one mitochondrion with reduced density of cristae. **(B)** BUN and Cr of 8-week old tubule-specific male knockout mice (Cre/+ fl/fl) and genotype controls (fl/fl).

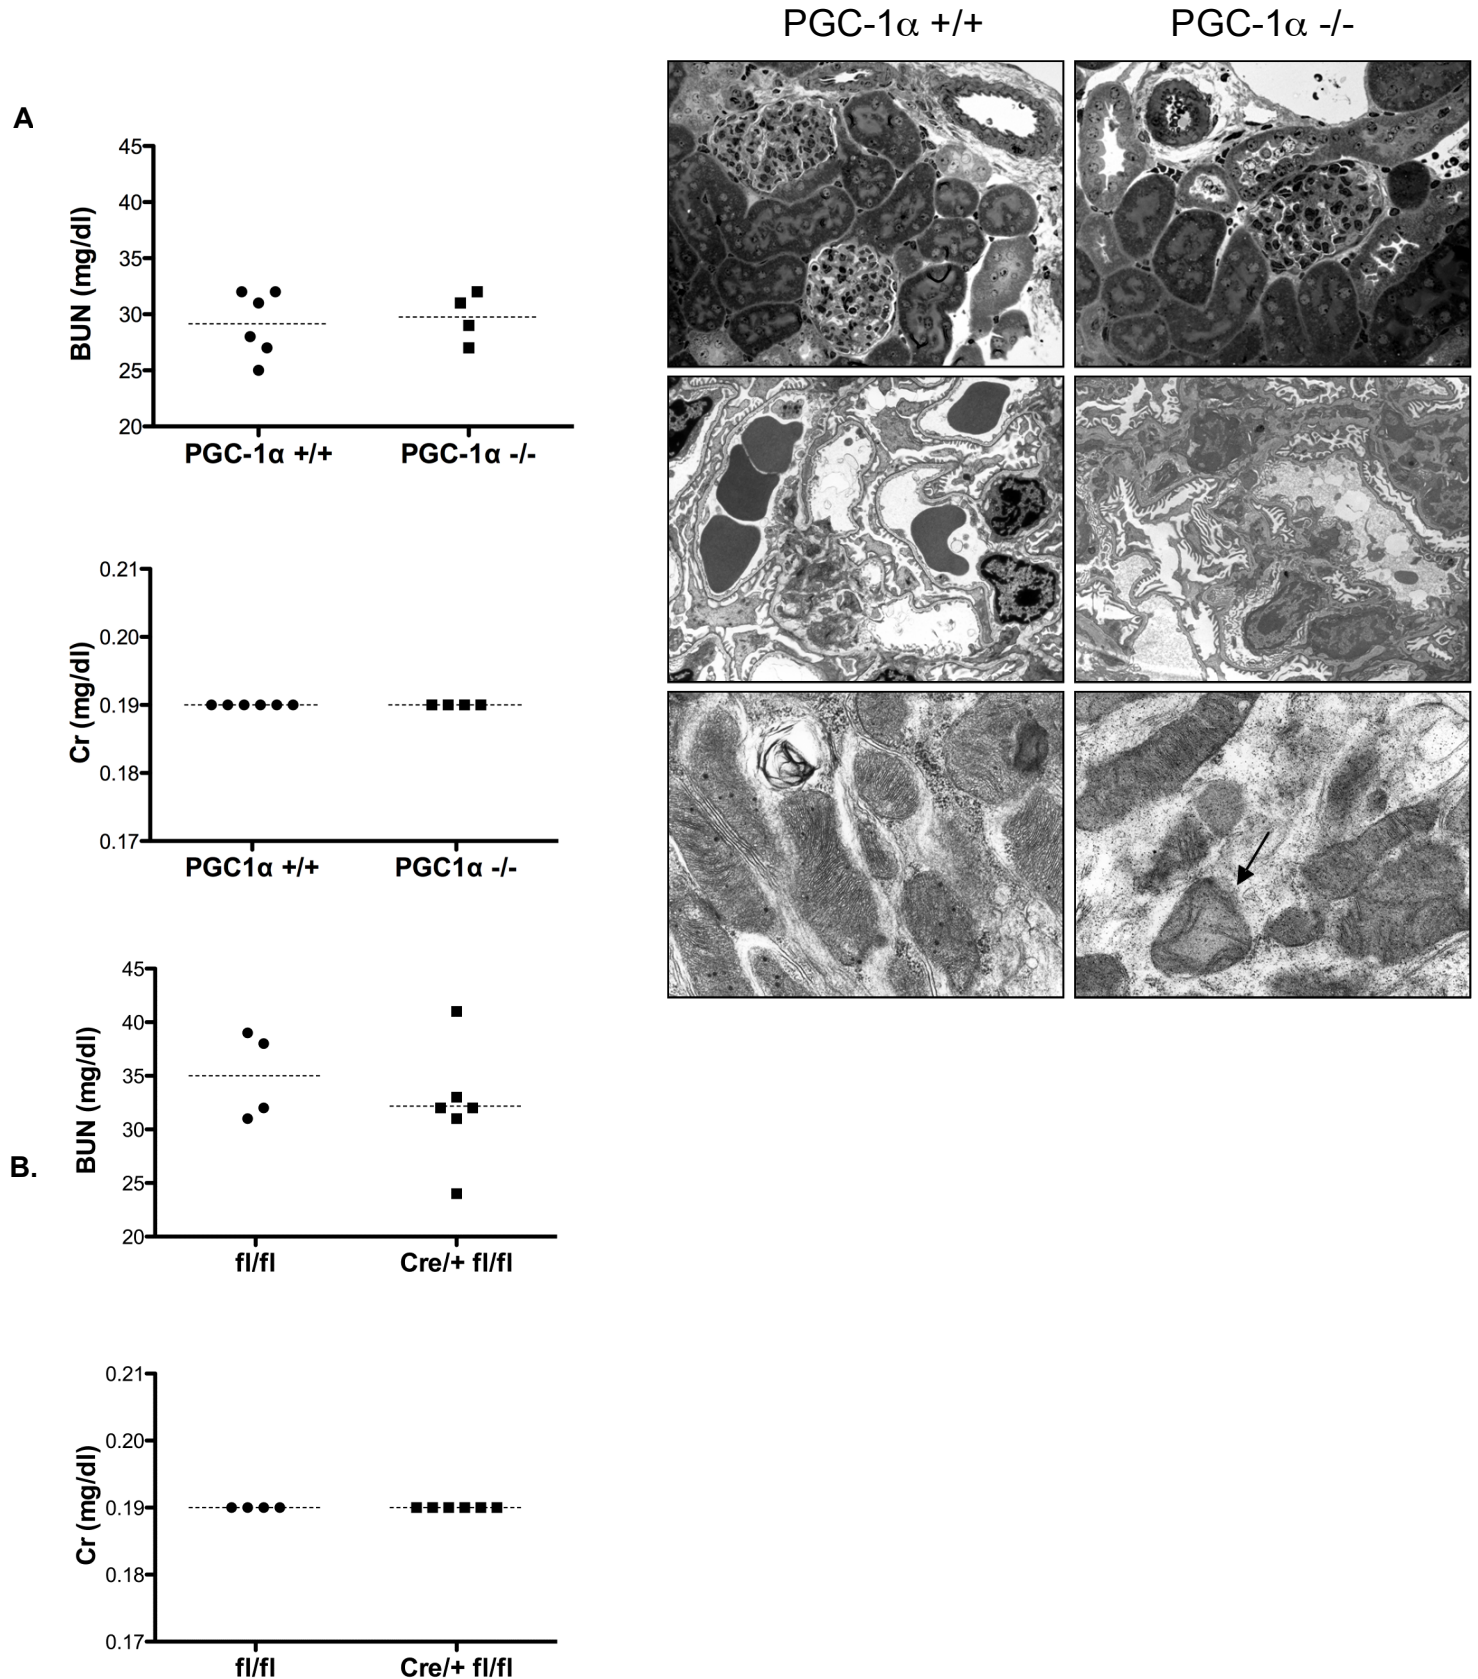

Supplement: JCI58662sd.pdf [file JCI58662sd.pdf]
